# Supplementary material for: Rab32/38-Dependent and -Independent Transport of Tyrosinase to Melanosomes in B16-F1 Melanoma Cells
Source: MDPI journal article supplement (doi:10.3390/ijms232214144), 2022-11-16
Supplement: s1 [file s1]

## Supplemental Information

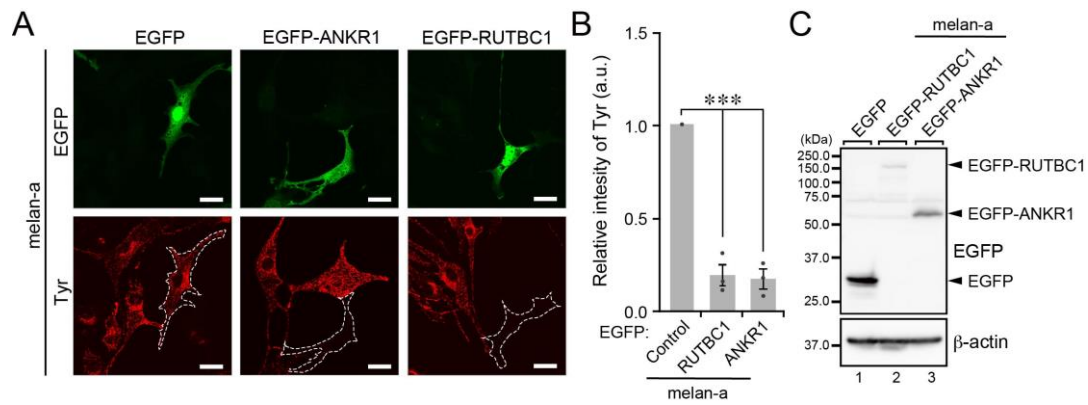

**Figure S1.** Overexpression of EGFP-tagged RUTBC1 and Varp-ANKR1 in melan-a cells resulted in a dramatic decrease in Tyr signals. (A) Representative Tyr images of melan-a cells expressing either EGFP alone, EGFP-RUTBC1, or EGFP-ANKR1. The EGFP-expressing cells are outlined with broken white lines. Scale bars, 20  $\mu$ m. (B) Quantification of the Tyr signals in melan-a cells shown in (A). The graph shows the means and SEM of the data obtained in three independent experiments ( $n > 5$  cells in each experiment). \*\*\*,  $p < 0.001$ ; NS, not significant (Tukey's test). (C) Expression of EGFP-tagged proteins in melan-a cells. Lysates of the cells indicated were analyzed by immunoblotting with antibodies against GFP (top) and  $\beta$ -actin (bottom).

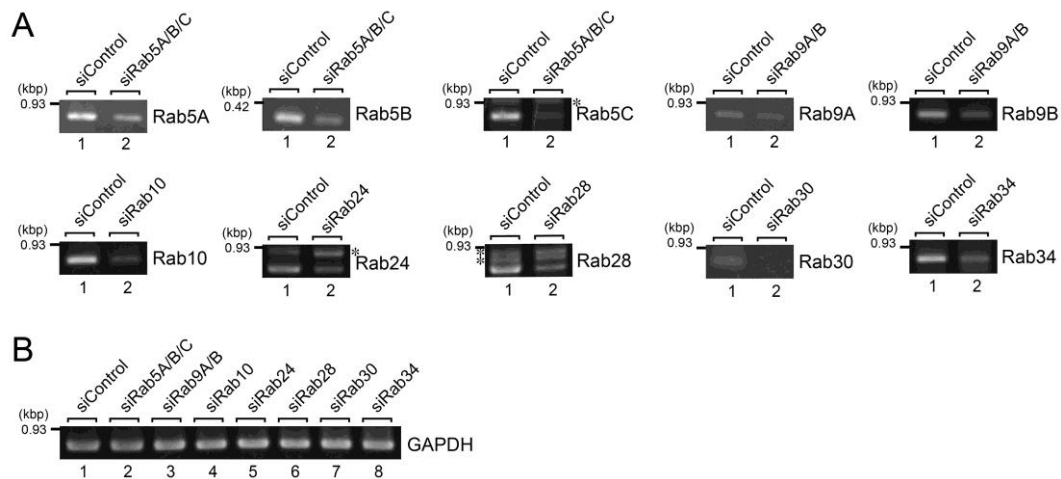

**Figure S2.** KD efficiency of the candidate Rabs whose KD resulted in a decrease in Tyr signals in *Rab32/38*-KO B16-F1 cells. (A) RNAi-mediated KD of the candidate Rabs in *Rab32/38*-KO cells (see Figure 6A) as revealed by an RT-PCR analysis. The authenticity of each band was confirmed by direct sequencing of the PCR products. The asterisks indicate nonspecific bands. (B) GAPDH expression is shown for reference to ensure that equivalent amounts of first-strand cDNA were used for the analysis shown in (A). The size of the molecular mass markers (kbp, kilobase pair) is shown on the left side of each panel.

**Table S1. List of materials used in this study.**

| Oligonucleotides                            | Sequence (5'-to-3' direction)                       | Source                                        |
|---------------------------------------------|-----------------------------------------------------|-----------------------------------------------|
| <b>siRNAs</b>                               |                                                     |                                               |
| mouse <i>Rab32</i> siRNA                    | CAACATGACTCGAGTATAC                                 | Nippon Gene (Toyama, Japan)                   |
| mouse <i>Rab1A–Rab43</i> siRNA#1 collection | See Table S1 in <i>EMBO Rep.</i> (2013) 14, 450-457 | <i>EMBO Rep.</i> (2013) 14, 450-457           |
| mouse <i>Rab10</i> siRNA#2                  | CAAGAGAGTTGTACCGAAA                                 | Nippon Gene (Toyama, Japan)                   |
| mouse <i>Rab24</i> siRNA#2                  | CTATGCCGATAATATCAAA                                 | Nippon Gene (Toyama, Japan)                   |
| mouse <i>Rab34</i> siRNA#2                  | TGGAACGATTTGAAGTCTT                                 | Nippon Gene (Toyama, Japan)                   |
| <b>sgRNA primers</b>                        |                                                     |                                               |
| Tyr-sgRNA-fw                                | CACCGAGTCCTGCGGCCAGCTTTC                            | Eurofins Genomics (Tokyo, Japan)              |
| Tyr-sgRNA-rv                                | AAACGAAAGCTGGCCGAGGGACTC                            | Eurofins Genomics (Tokyo, Japan)              |
| Hps4-sgRNA-fw                               | CACCGTTACCTTGAACCGTCATAC                            | Eurofins Genomics (Tokyo, Japan)              |
| Hps4-sgRNA-rv                               | AAACGTATGACGGTTCCAAGGTAAC                           | Eurofins Genomics (Tokyo, Japan)              |
| Rab27A-sgRNA-fw                             | CACCGAACCAGATATAGTGCTGTG                            | Eurofins Genomics (Tokyo, Japan)              |
| Rab27A-sgRNA-rv                             | AAACCACAGCACTATATCTGGGTTC                           | Eurofins Genomics (Tokyo, Japan)              |
| Ra32-sgRNA-fw                               | CACCGAATGGTGGCGCGGTAGTGCT                           | Eurofins Genomics (Tokyo, Japan)              |
| Rab32-sgRNA-rv                              | AAACAGCACTACCGCGCCACCATTC                           | Eurofins Genomics (Tokyo, Japan)              |
| Ra38-sgRNA-fw                               | CACCGTGGTGTGGACTTCGCGCTGA                           | Eurofins Genomics (Tokyo, Japan)              |
| Rab38-sgRNA-rv                              | AAACTCAGCGCAAGTCCACACCAC                            | Eurofins Genomics (Tokyo, Japan)              |
| <b>Genomic PCR primers</b>                  |                                                     |                                               |
| Tyr-genome-fw                               | TATGTTTTGCTAAAGTGAGGTAAGAAAAGA                      | Eurofins Genomics (Tokyo, Japan)              |
| Tyr-genome-rv                               | GTTATATAGGTCTTAGCCAAAACATGTGAT                      | Eurofins Genomics (Tokyo, Japan)              |
| Hps4-genome-fw                              | GAGTTTGGTATTTTGCTGTCTTCTGTTAT                       | Eurofins Genomics (Tokyo, Japan)              |
| Hps4-genome-rv                              | AACCTGTCTCAAACTTCAAAGATAAGTAA                       | Eurofins Genomics (Tokyo, Japan)              |
| Rab27A-genome-fw                            | TGGCCAGTTTtaggaATGTAATCTGTGGTT                      | Eurofins Genomics (Tokyo, Japan)              |
| Rab27A-genome-rv                            | GTTTGACACTGAGTTGGCTCTTTTCTCTTT                      | Eurofins Genomics (Tokyo, Japan)              |
| Rab32-genome-fw                             | GTCTTCCCGTTCTATTGTTCACCTT                           | Eurofins Genomics (Tokyo, Japan)              |
| Rab32-genome-rv                             | CTAGATTATCAGCGTACTCAGCCT                            | Eurofins Genomics (Tokyo, Japan)              |
| Rab38-genome-fw                             | ATCTCTGTGAAAGGAGTAAAGCACT                           | Eurofins Genomics (Tokyo, Japan)              |
| Rab38-genome-rv                             | ATTAAGCCAAACTTTCCAAGAGTGG                           | Eurofins Genomics (Tokyo, Japan)              |
| <b>RT-PCR primers</b>                       |                                                     |                                               |
| Rab5A-Met                                   | GGATCCATGGCTAATCGAGGAGCAAC                          | <i>J. Biol. Chem.</i> (2002) 277, 9212-9218   |
| Rab5A-stop                                  | TCAGTTACTACAACACTGGC                                | <i>J. Biol. Chem.</i> (2002) 277, 9212-9218   |
| Rab5B-fw                                    | CAGGCTGCAATCGTGGTCTA                                | Eurofins Genomics (Tokyo, Japan)              |
| Rab5B-rv                                    | TTCTGGGGTTTCGCTCTTTGG                               | Eurofins Genomics (Tokyo, Japan)              |
| Rab5C-Met                                   | GGATCCATGGCGGGTCAAGGAGGTGC                          | <i>Genes Cells</i> (2006) 11, 1023-1037       |
| Rab5C-stop                                  | TCAGTTGCTGCAGCACTGGC                                | <i>Genes Cells</i> (2006) 11, 1023-1037       |
| Rab9A-Met                                   | CGGATCCATGGCAGGAAAATCGTCTCT                         | <i>J. Biol. Chem.</i> (2002) 277, 9212-9218   |
| Rab9A-stop                                  | TCAACAGCAAGATGAGTTTG                                | <i>J. Biol. Chem.</i> (2002) 277, 9212-9218   |
| Rab9B-Met                                   | GGATCCATGAGTGGGAAATCCCTTCT                          | <i>Genes Cells</i> (2006) 11, 1023-1037       |
| Rab9B-stop                                  | CTAACAACAAGAAGAACTTG                                | <i>Genes Cells</i> (2006) 11, 1023-1037       |
| Rab10-Met                                   | CGGATCCATGGCGAAGAAGACGTACGA                         | <i>J. Biol. Chem.</i> (2002) 277, 9212-9218   |
| Rab10-stop                                  | TCAGCAGCACTTGCTCTTCC                                | <i>J. Biol. Chem.</i> (2002) 277, 9212-9218   |
| Rab24-Met                                   | CGGATCCATGAGCGGGCAGCGCGTGGA                         | <i>J. Biol. Chem.</i> (2003) 278, 15373-15380 |
| Rab24-stop                                  | TCAGTGATGACAACAGCTGT                                | <i>J. Biol. Chem.</i> (2003) 278, 15373-15380 |
| Rab28-Met                                   | CGGATCCATGTCAGACTCTGAGGAGGA                         | <i>J. Biol. Chem.</i> (2002) 277, 9212-9218   |

|            |                             |                                               |
|------------|-----------------------------|-----------------------------------------------|
| Rab28-stop | TCACTGCACTGCACACATGG        | <i>J. Biol. Chem.</i> (2002) 277, 9212-9218   |
| Rab30-Met  | CGGATCCATGAGTATGGAAGATTATGA | <i>J. Biol. Chem.</i> (2003) 278, 15373-15380 |
| Rab30-stop | TTAGTTGAAATTACAACAAG        | <i>J. Biol. Chem.</i> (2003) 278, 15373-15380 |
| Rab34-Met  | CGGATCCATGAACATTCTGGCGCCCGT | <i>J. Biol. Chem.</i> (2002) 277, 12432-12436 |
| Rab34-stop | TCAGGGACAACATGTGGCCT        | <i>J. Biol. Chem.</i> (2002) 277, 12432-12436 |

| Plasmids              | RIKEN BioResource Research Center Cat#            | Source                                      |
|-----------------------|---------------------------------------------------|---------------------------------------------|
| pEF-Tyr-FLAG          | RDB14635                                          | <i>J. Biochem.</i> (2017) 161, 323-326      |
| pEF-T7-Hps4           | RDB17366                                          | <i>J. Biol. Chem.</i> (2019) 294, 6912-6922 |
| pEGFP-C1-Rab27A       | RDB17273                                          | <i>J. Cell Sci.</i> (2006) 119, 2196-2203   |
| pEF-T7-GST-Varp-ANKR1 | RDB17371                                          | <i>J. Biol. Chem.</i> (2016) 291, 1427-1440 |
| pEF-T7-GST            |                                                   | <i>J. Biol. Chem.</i> (2016) 291, 1427-1440 |
| pEGFP-C1-Varp-ANKR1   | Constructed from pEF-T7-Varp-ANKR1 (see RDB17371) | <i>Mol. Biol. Cell</i> (200) 20, 2900-2908  |
| pEGFP-C1-RUTBC1       | RDB15018                                          | <i>Genes Cells</i> (2009) 14, 41-52         |

| Antibodies                                      | Dilution                          | Source                                            |
|-------------------------------------------------|-----------------------------------|---------------------------------------------------|
| Anti-Tyr rabbit polyclonal Ab                   | IB (0.054 µg/ml); IF (0.27 µg/ml) | <i>Traffic</i> (2011) 12, 627-643                 |
| Anti-Tyrp1 rabbit polyclonal Ab                 | IB (0.23 µg/ml)                   | <i>J. Invest. Dermatol.</i> (2013) 133, 2237-2246 |
| Anti-Tyrp1 mouse monoclonal Ab                  | IF (1/1,000 dilution)             | Santa Cruz Biotechnology (Dallas, TX) sc-58438    |
| Anti-HPS4 rabbit polyclonal Ab                  | IB (1/200 dilution)               | Proteintech (Rosemont, IL) 14627-1-AP             |
| Anti-Rab27A rabbit polyclonal Ab                | IB (4.8 µg/ml)                    | <i>Genes Cells</i> (2006) 11, 623-631             |
| Anti-Rab32 rabbit polyclonal Ab                 | IB (5.8 µg/ml)                    | <i>Mol. Biol. Cell</i> (2009) 20, 2900-2908       |
| Anti-Rab38 mouse monoclonal Ab                  | IB (1/1,000 dilution)             | Abnova (Tipei, Taiwan) H00023682-M02              |
| Anti-FLAG tag (M2)-HRP monoclonal Ab            | IB (1/5,000 dilution)             | Sigma-Aldrich (St. Louis, MA) A8592               |
| Anti-FLAG tag (M2) monoclonal Ab                | IF (1/1,000 dilution)             | Sigma-Aldrich (St. Louis, MA) F3165               |
| Ant-GFP polyclonal Ab                           | IB (1/1,000 dilution)             | MBL (Nagoya, Japan) 598                           |
| Anti-GST mouse monoclonal Ab                    | IB (0.2 µg/ml)                    | Santa Cruz Biotechnology (Dallas, TX) sc-138      |
| Anti-Rab10 (D36C4) mouse monoclonal Ab          | IB (1/100 dilution)               | Cell Signaling Technology (Danvers, MA) 8127      |
| Anti-Rab24 rabbit polyclonal Ab                 | IB (1.08 µg/ml)                   | <i>J. Cell Biol.</i> (2016) 213, 355-369          |
| Anti-Rab34 rabbit polyclonal Ab                 | IB (10.6 µg/ml)                   | <i>J. Cell Biol.</i> (2016) 213, 355-369          |
| Goat Anti-Mouse IgG(H+L), Human ads-HRP         | IB (1/10,000 dilution)            | SouthernBiotech (Birmingham, AL) 1031-05          |
| HRP-anti-rabbit IgG                             | IB (1/10,000 dilution)            | GE Healthcare (Chicago, IL) NA934-1ML             |
| Alexa Fluor plus 488-conjugated anti-mouse IgG  | IF (1/1,000 dilution)             | Thermo Fisher Scientific (Waltham, MA) A32772     |
| Alexa Fluor plus 488-conjugated anti-rabbit IgG | IF (1/1,000 dilution)             | Thermo Fisher Scientific (Waltham, MA) A32721     |
| Alexa Fluor plus 555-conjugated anti-mouse IgG  | IF (1/1,000 dilution)             | Thermo Fisher Scientific (Waltham, MA) A32777     |
| Alexa Fluor plus 555-conjugated anti-rabbit IgG | IF (1/1,000 dilution)             | Thermo Fisher Scientific (Waltham, MA) A32732     |

Ab, antibody; fw, forward; IB, immunoblot; IF, immunofluorescence; rv, reverse.
